# Supplementary material
Source: publisher site journal article supplement (https://www.spandidos-publications.com/4841/downloadSupplementary)

Figure S1. Flow chart of the experimental design and allocation of experimental animal numbers. BA was performed on each group at 4, 8, 12 and 24 weeks after cell transplantation. In total, two rats in each group were perfused at 8 and 20 weeks after cell transplantation, and whole-brain cryosections were performed for IF detection. At week 12, two rats in each group were perfused for hematoxylin and eosin staining and tyrosine hydroxylase-3,3'-diaminobenzidine detection by IHC. The remaining six rats were used for long-term monitoring of behavioral changes. BA, behavioral analysis; IF, immunofluorescence; IHC, immunohistochemistry; 6-OHDA, 6-hydroxydopamine; H-DMEM, high-glucose Dulbecco's modified Eagle's medium; RiPSCs-6F, rat induced pluripotent stem cells induced by OSKMNL; RiPSCs-6F/CR, rat induced pluripotent stem cells induced by OSKMNL + CR; OSKMNL, OCT3/4, Sox2, Klf4, c-Myc, Nanog and Lin28; CR, CHIR99021 and RepSox.

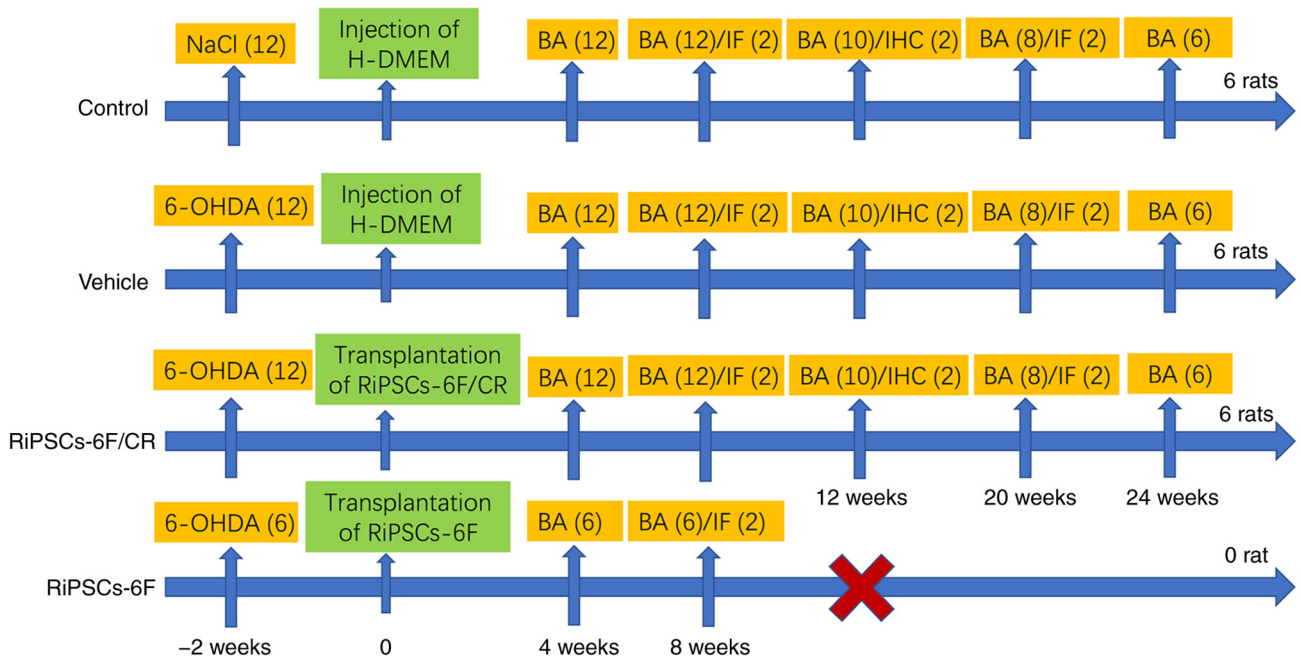

Supplement: Supplementary file 1 [file downloadSupplementary]
